# Supplementary material
Source: PubMed Central journal article supplement (PMC5563997)
Supplement: cdd201798x2.pdf [file cdd201798x2.pdf]

**a**

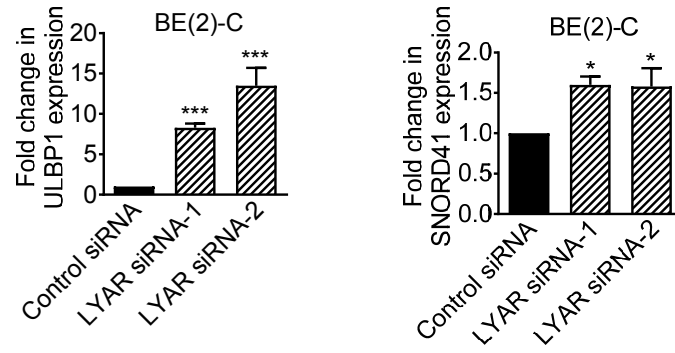

**b**

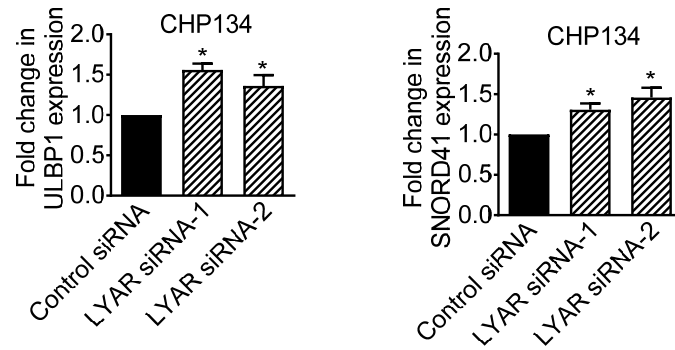

**Supplementary Figure S1. LYAR regulates oxidative stress gene expression.** BE(2)-C (a) and CHP134 (b) cells were transfected with control siRNA, LYAR siRNA-1 or LYAR siRNA-2 for 48 hours, followed by RNA extraction. RT-PCR analysis of ULBP1 and SNORD41 expression was performed. Error bars represented SE. \* indicated  $P < .05$ , and \*\*\*  $P < .001$ .

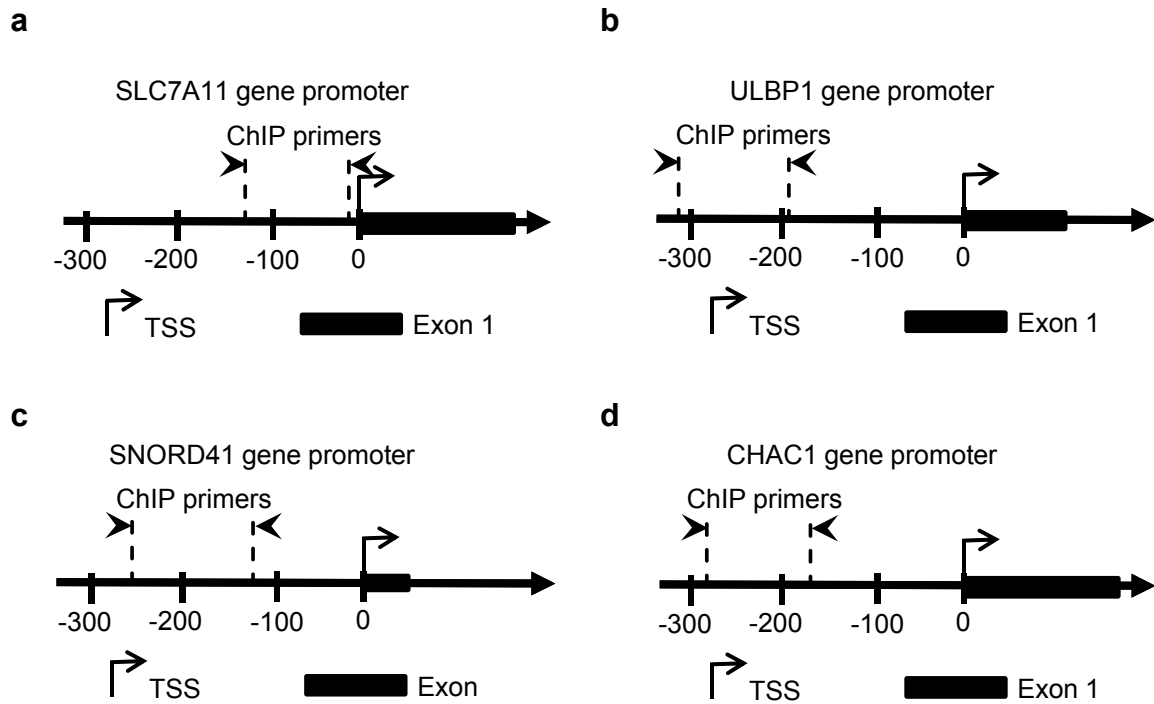

**Supplementary Figure S2.** Schematic representation of LYAR target gene promoters. Schematic representation of the gene promoters of SLC7A11 (**a**), ULBP1 (**b**), SNORD41 (**c**) and CHAC1 (**d**). TSS represented transcription start site.

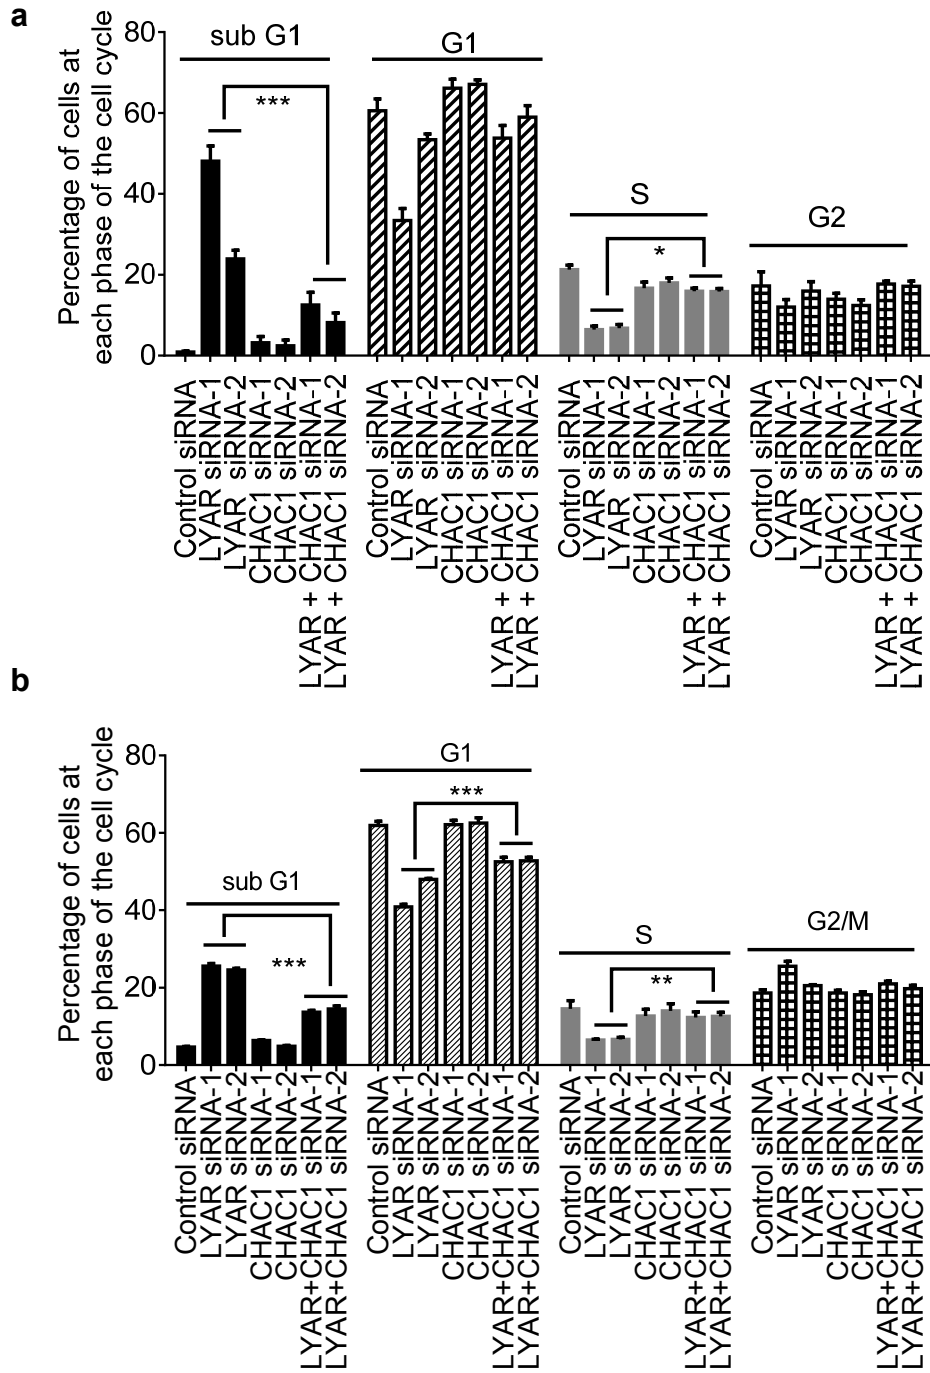

**Supplementary Figure S3. LYAR induces neuroblastoma cell proliferation and survival by repressing CHAC1 gene expression.** BE(2)-C (a) and CHP134 (b) cells were transfected with control siRNA, LYAR siRNA-1, LYAR siRNA-2, CHAC1 siRNA-1, CHAC1 siRNA-2, LYAR siRNA-1 plus CHAC1 siRNA-1, or LYAR siRNA-2 plus CHAC1 siRNA-2 for 72 hours. The cells were then stained with propidium iodide, and subjected to flow cytometry analyses of the cell cycle. The percentage of cells at each phase of the cell cycle was calculated. Error bars represented standard error. \*\* and \*\*\* indicated  $P < 0.01$  and  $0.001$  respectively.
